# Supplementary figures and images for: RETRACTED ARTICLE: Exosomal miR-4466 from nicotine-activated neutrophils promotes tumor cell stemness and metabolism in lung cancer metastasis
Source: PubMed Central journal article supplement (PMC9135627; doi:10.1038/s41388-022-02322-w), 2022-04-23

**Figure 4B**

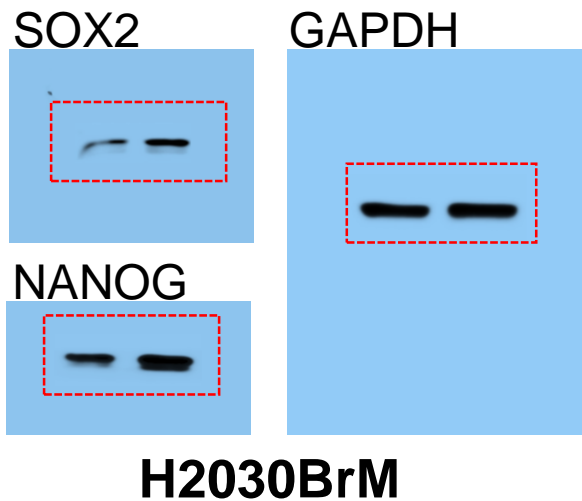

**Figure 4F**

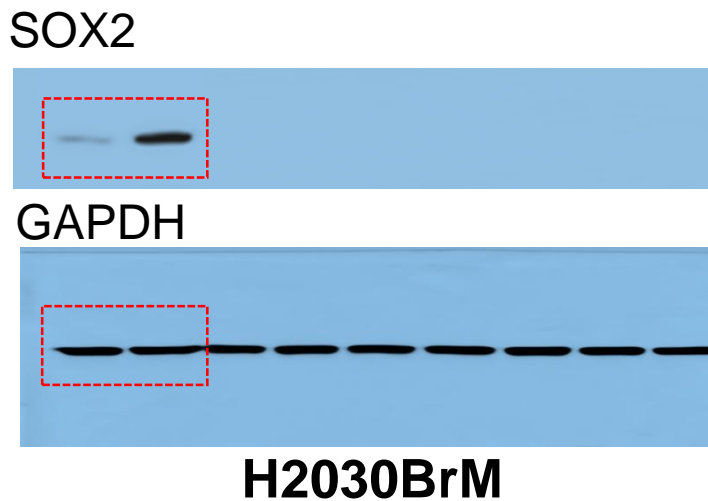

**Supplementary Figure 4L**

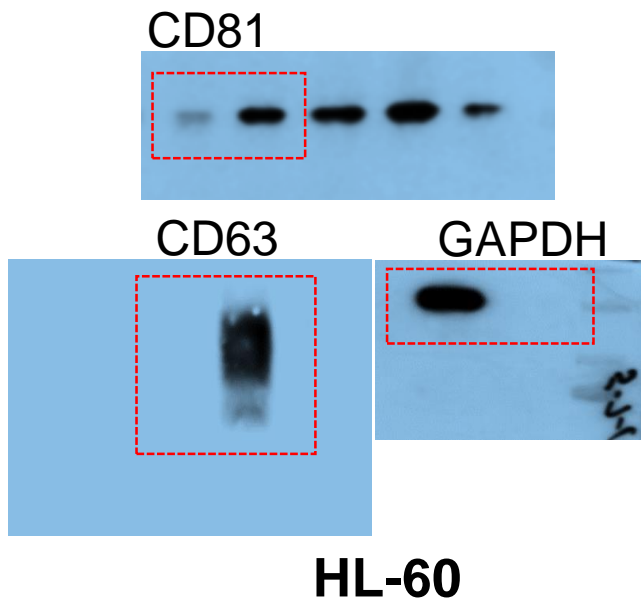

**Supplementary Figure 5F**

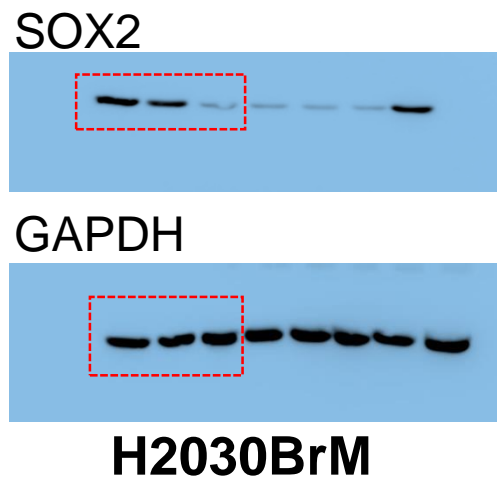

**Supplementary Figure 6A**

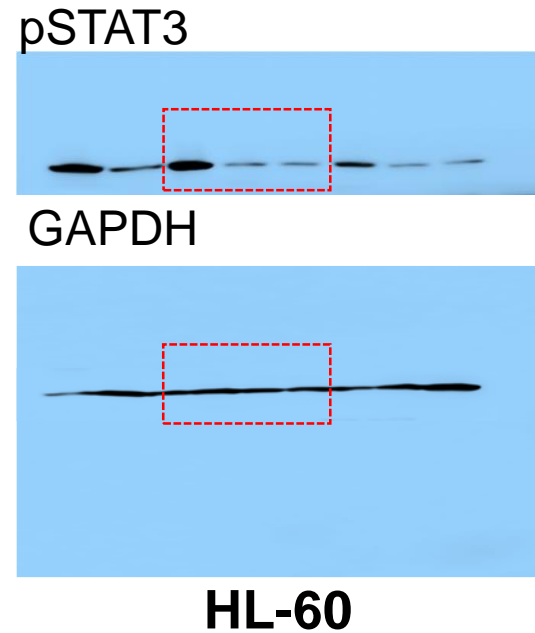

Supplement: 41388_2022_2322_MOESM8_ESM.pdf [file 41388_2022_2322_MOESM8_ESM.pdf]
